# Supplementary material for: Enkurin: A novel marker for myeloproliferative neoplasms from platelet, megakaryocyte, and whole blood specimens
Source: PubMed Central journal article supplement — bioRxiv. 2023 Jan 12:2023.01.07.523111. Preprint. [Version 2] doi: 10.1101/2023.01.07.523111 (PMC9881897; doi:10.1101/2023.01.07.523111), 2023-01-12

**A**

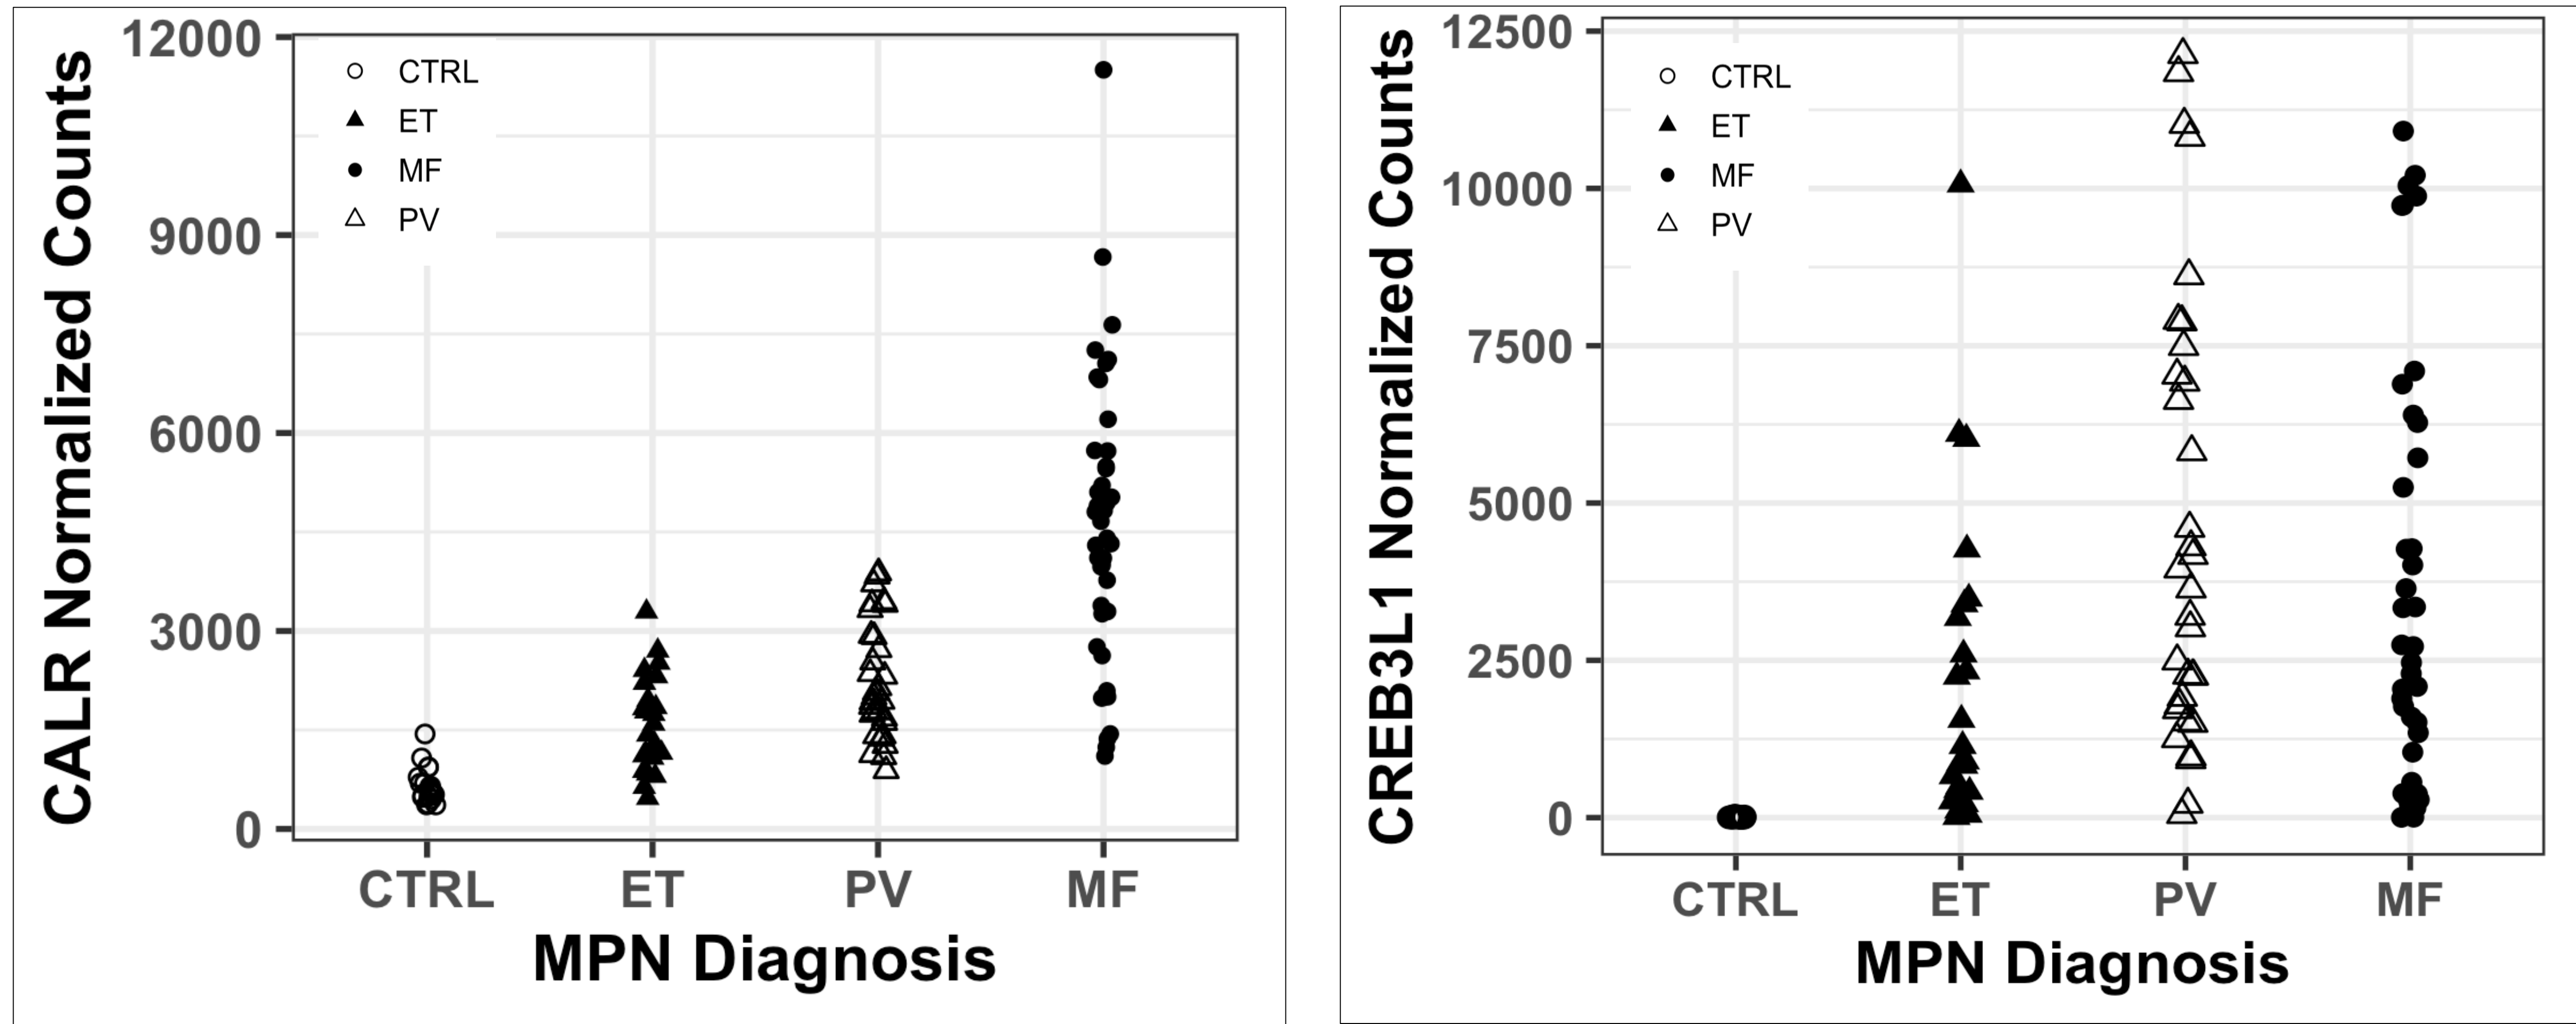

**B**

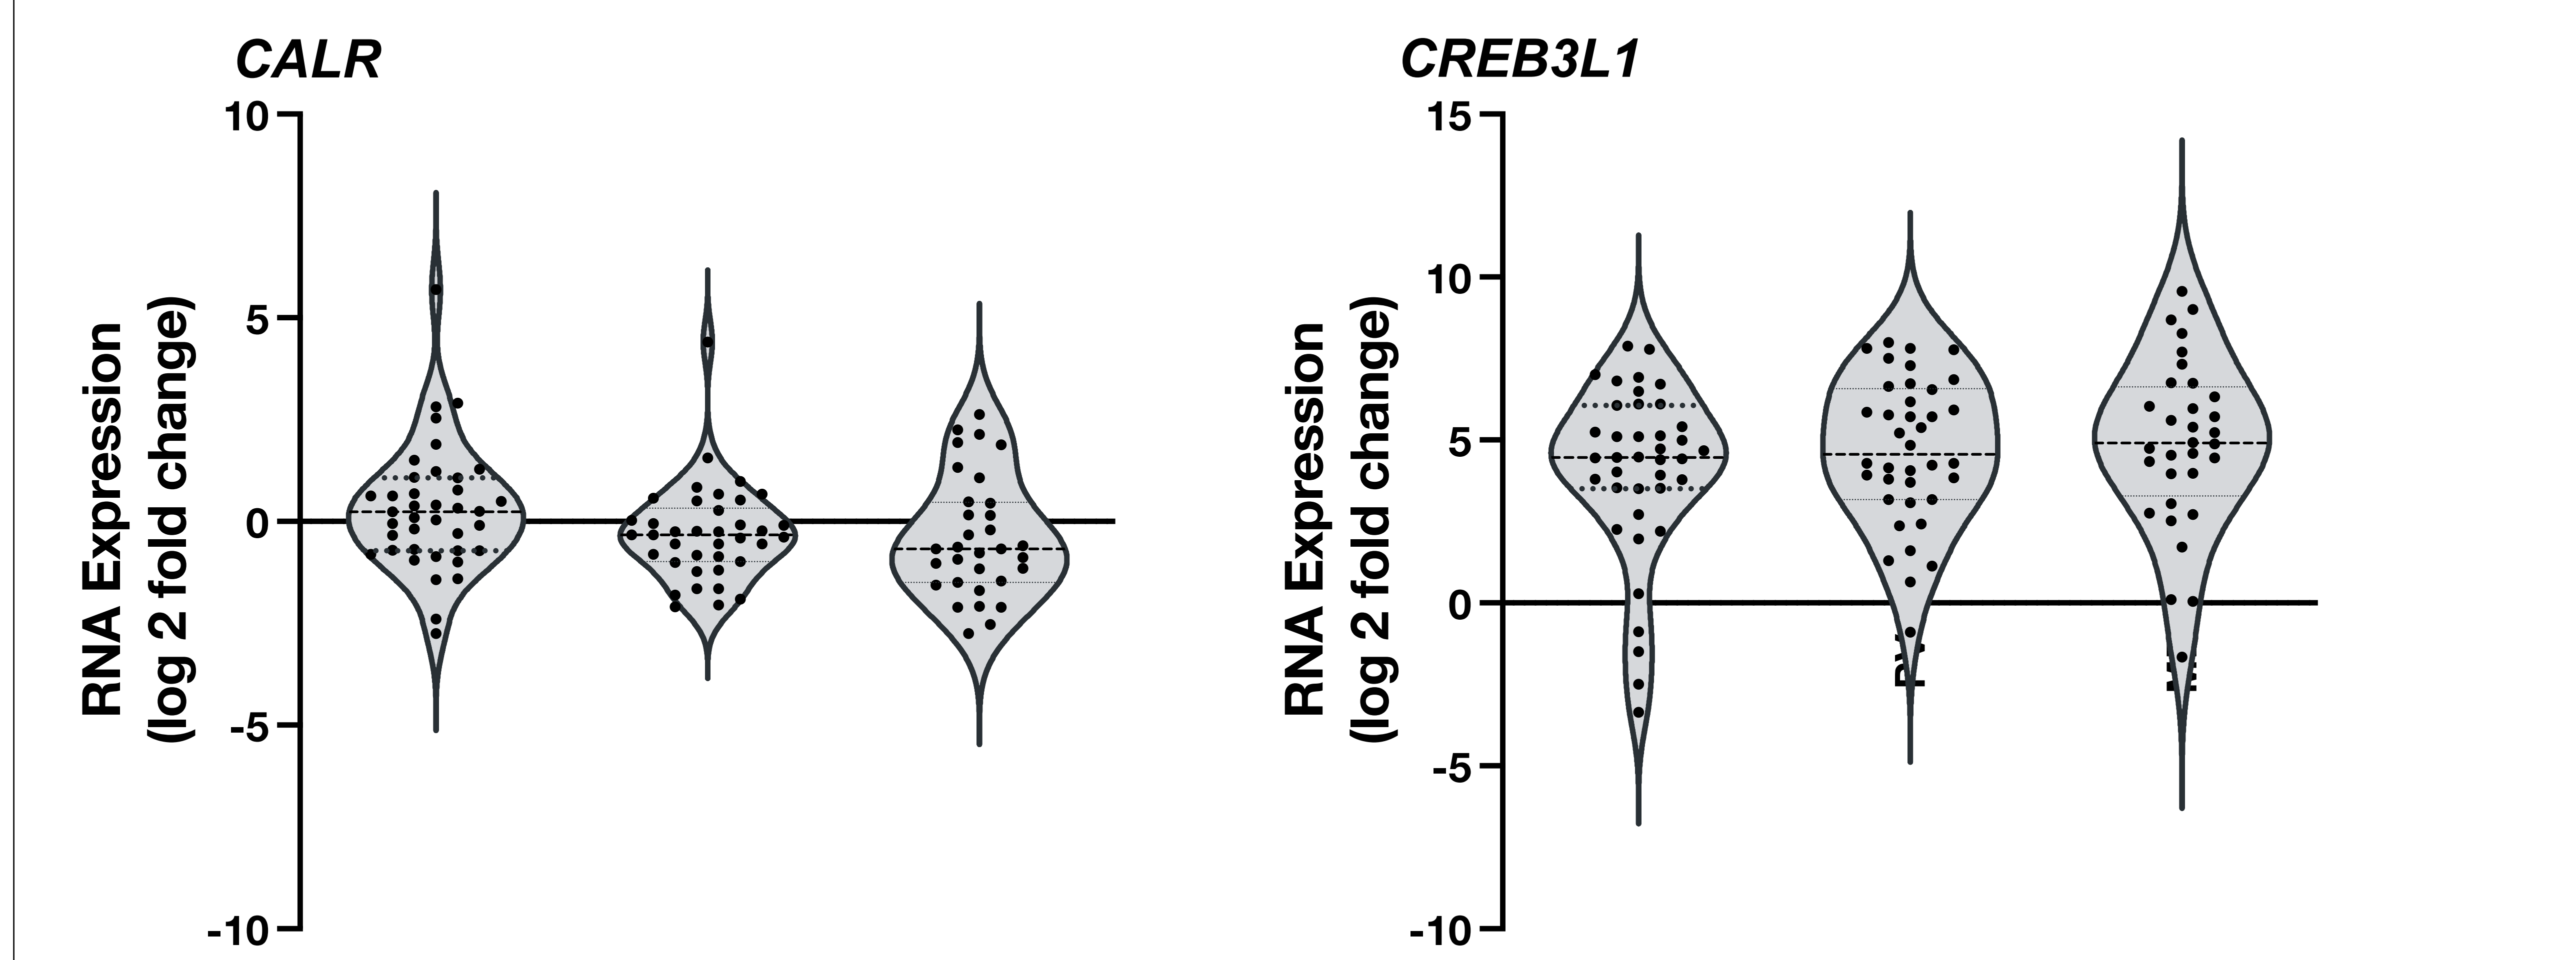

**C**

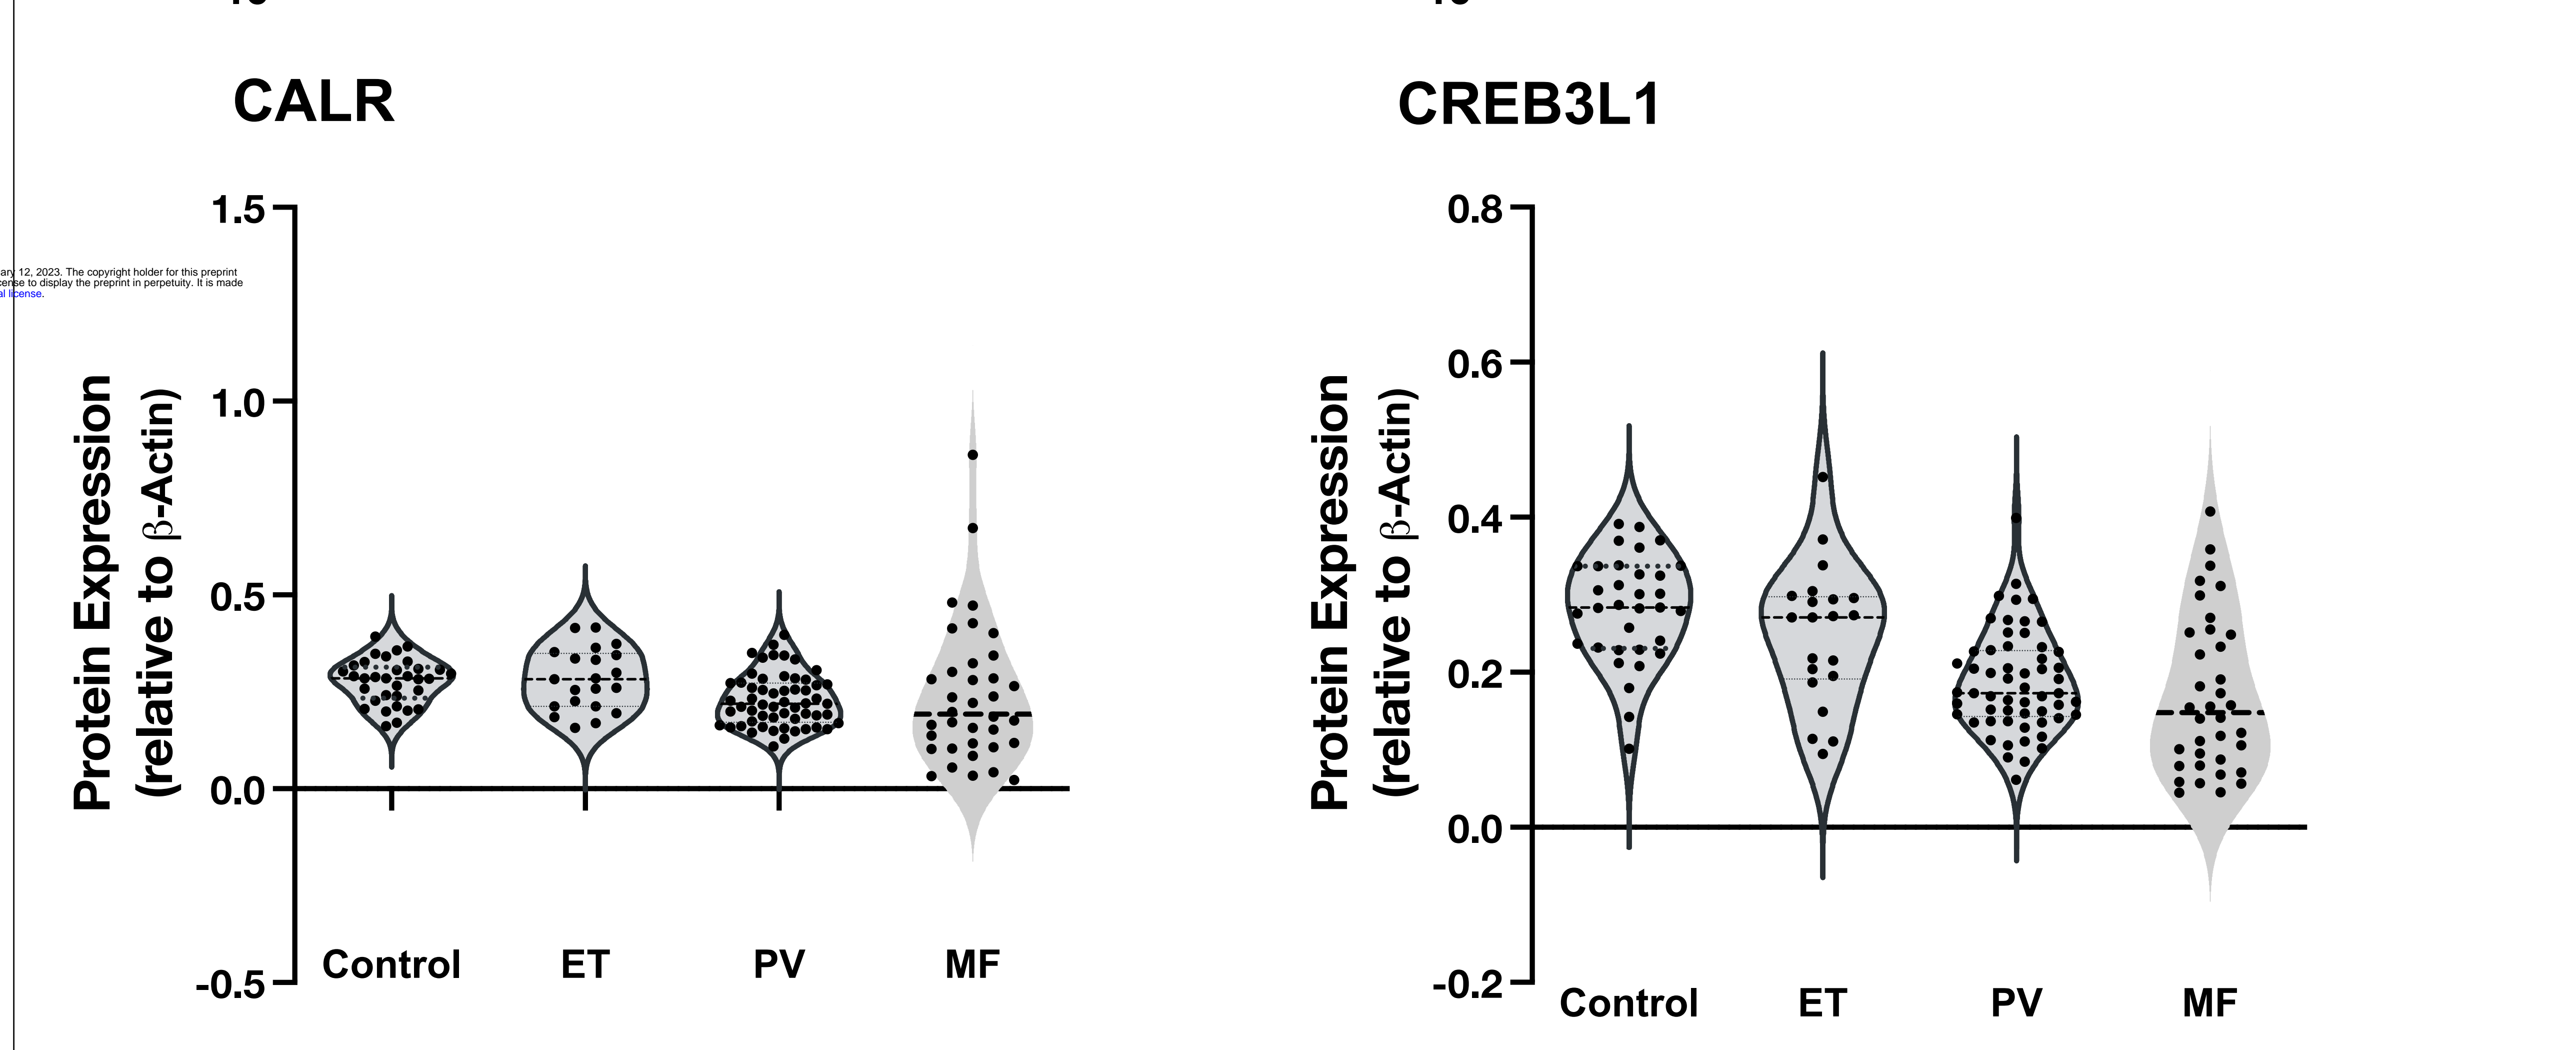

bioRxiv preprint doi: <https://doi.org/10.1101/2023.01.07.523111>; this version posted January 12, 2023. The copyright holder for this preprint (which was not certified by peer review) is the author/funder, who has granted bioRxiv a license to display the preprint in perpetuity. It is made available under aCC-BY-NC-ND 4.0 International license.

**A**

Day 1

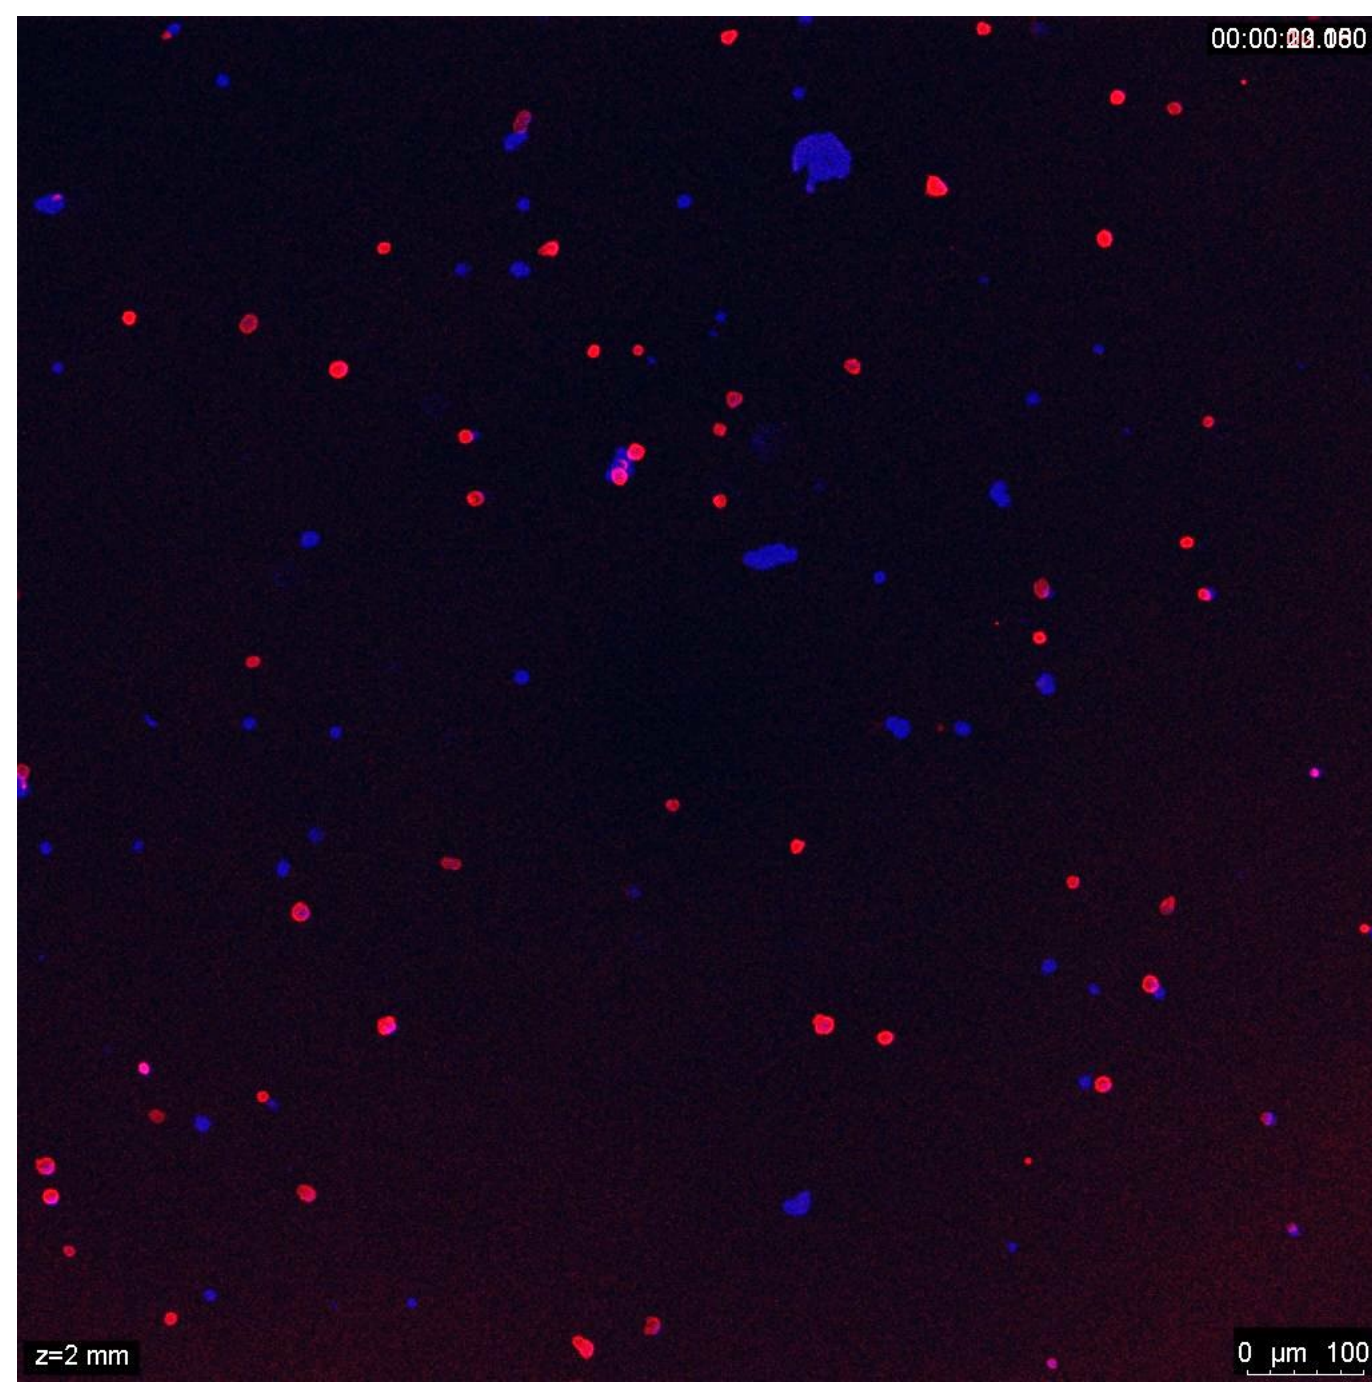

CD34  
CD42b  
Hoechst

Day 9

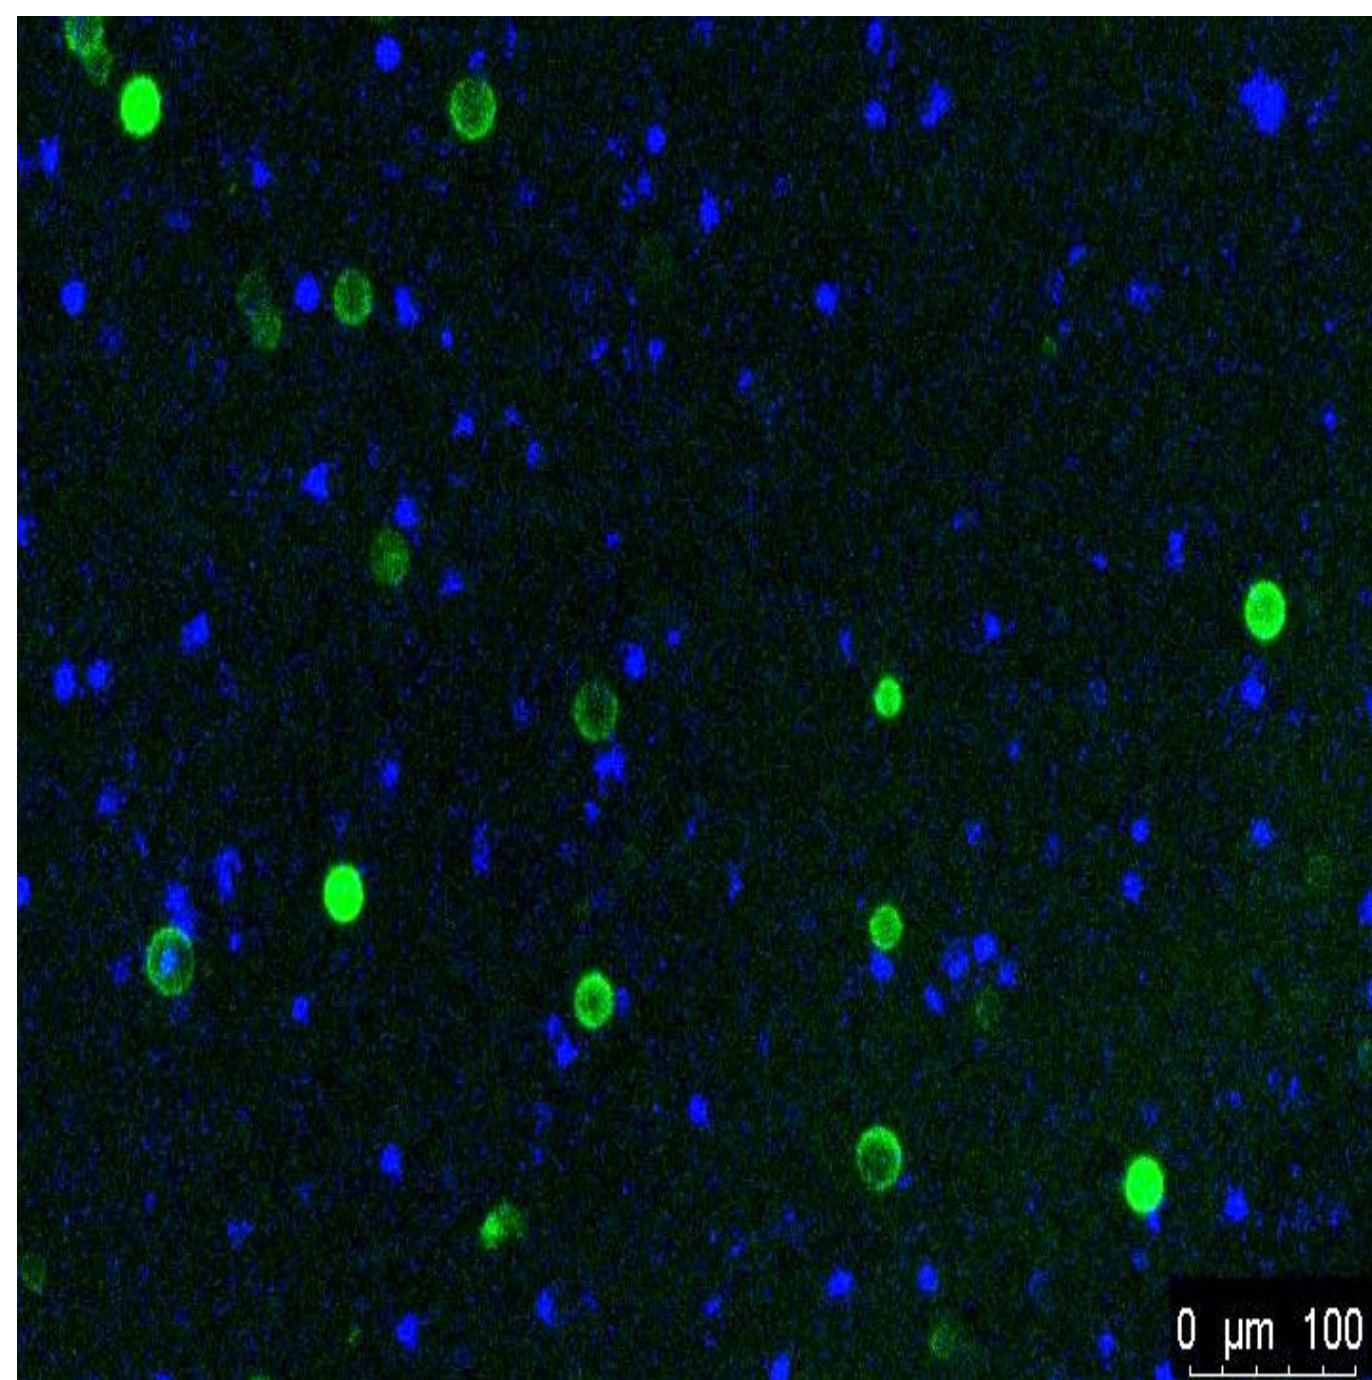

CD34  
CD42b  
Hoechst

Day 9

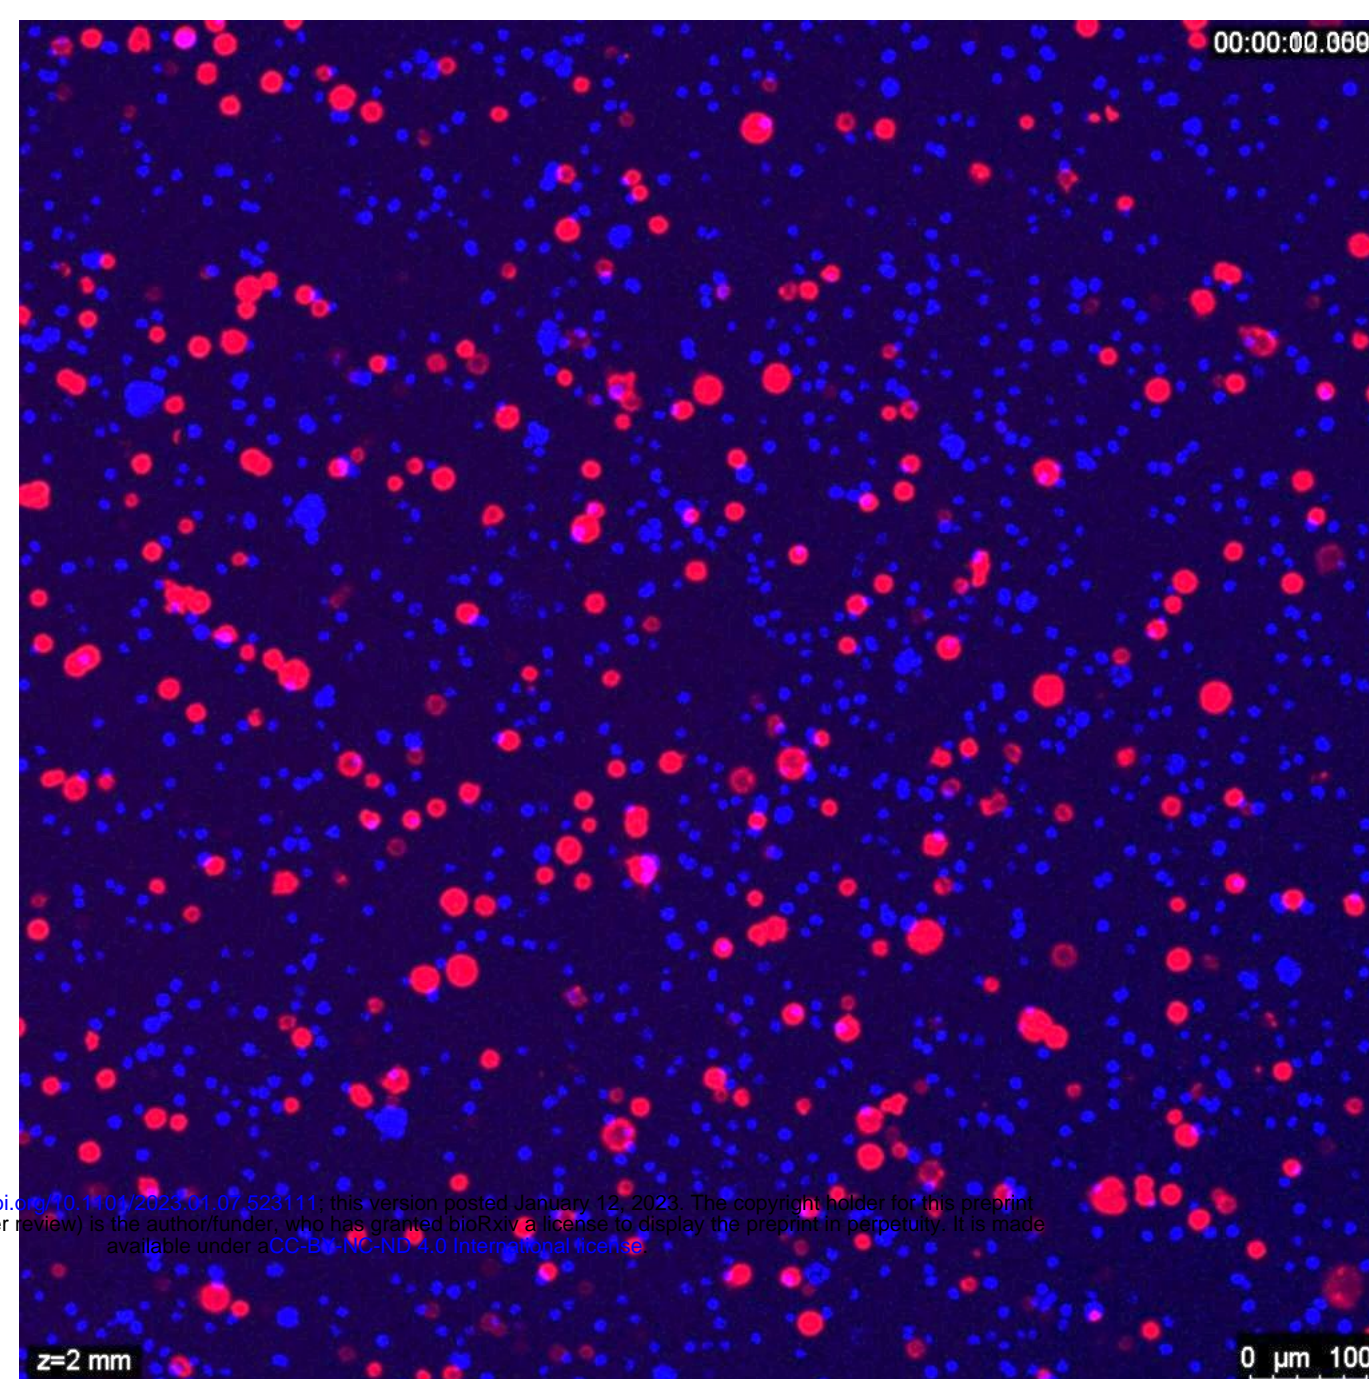

CD41  
Hoechst

Day 13

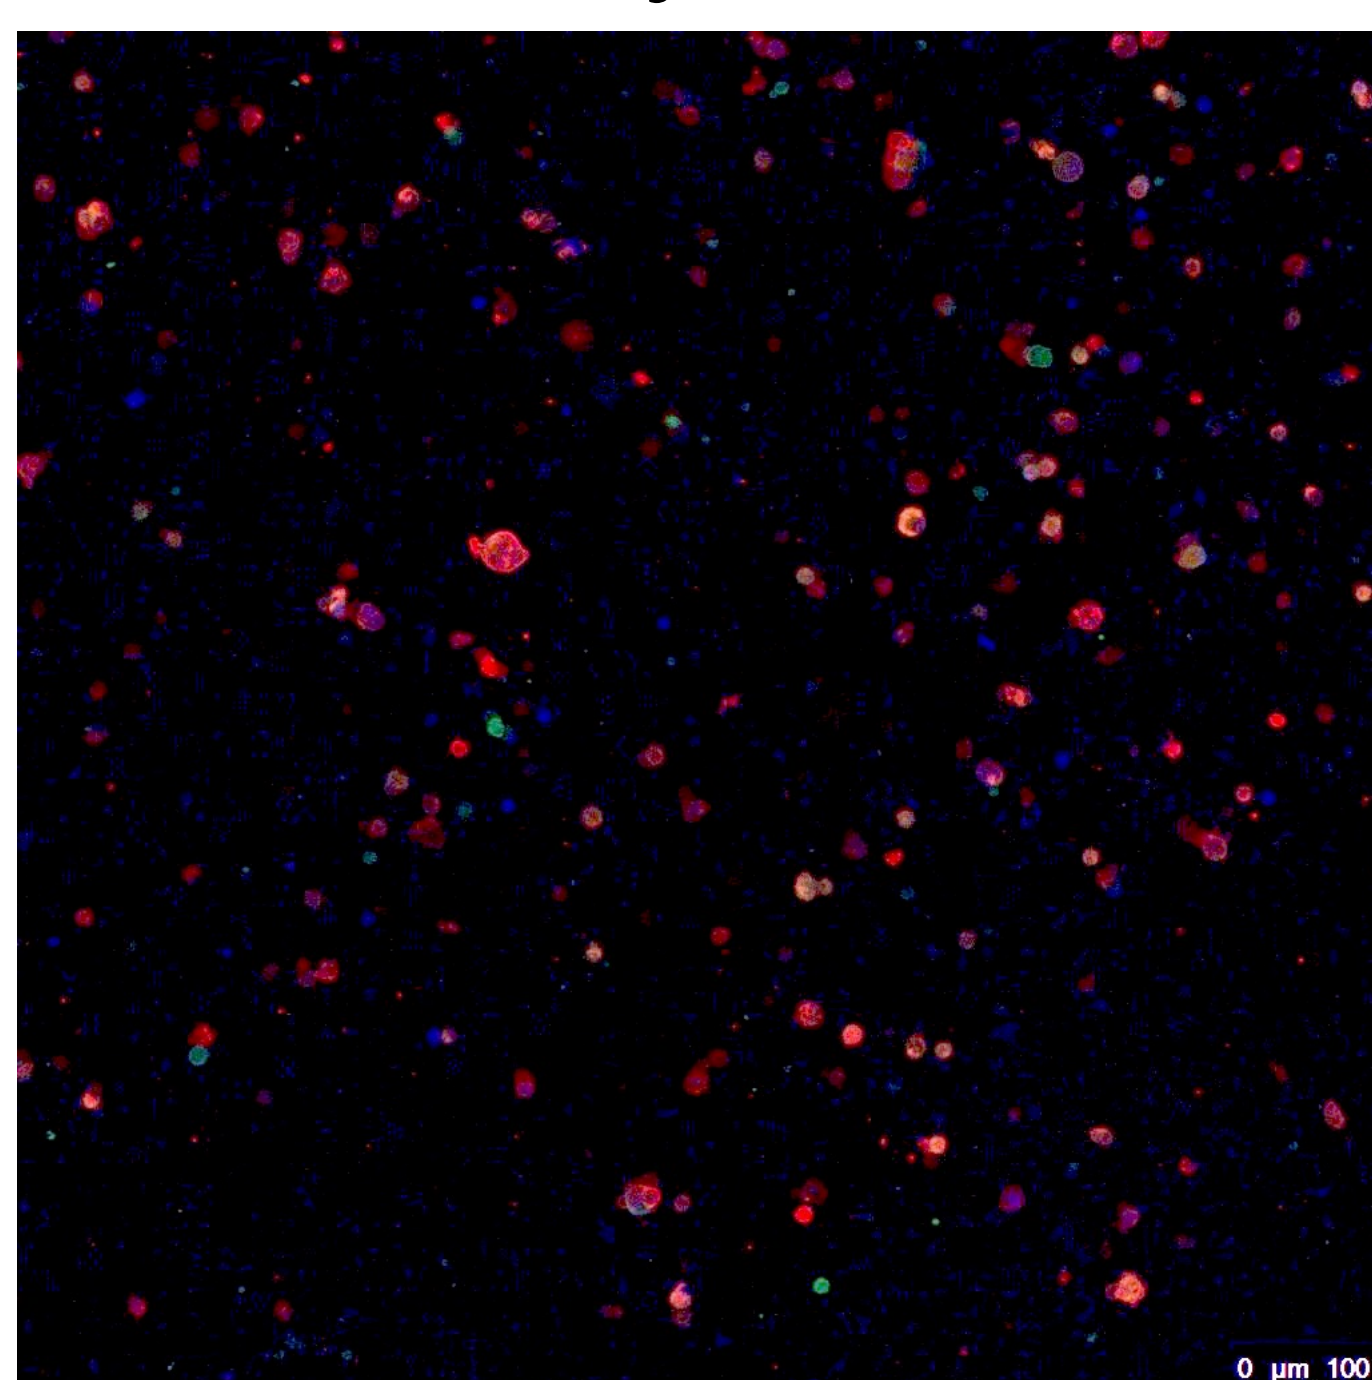

CD41  
CD42b  
Hoechst

**B**

Day 9

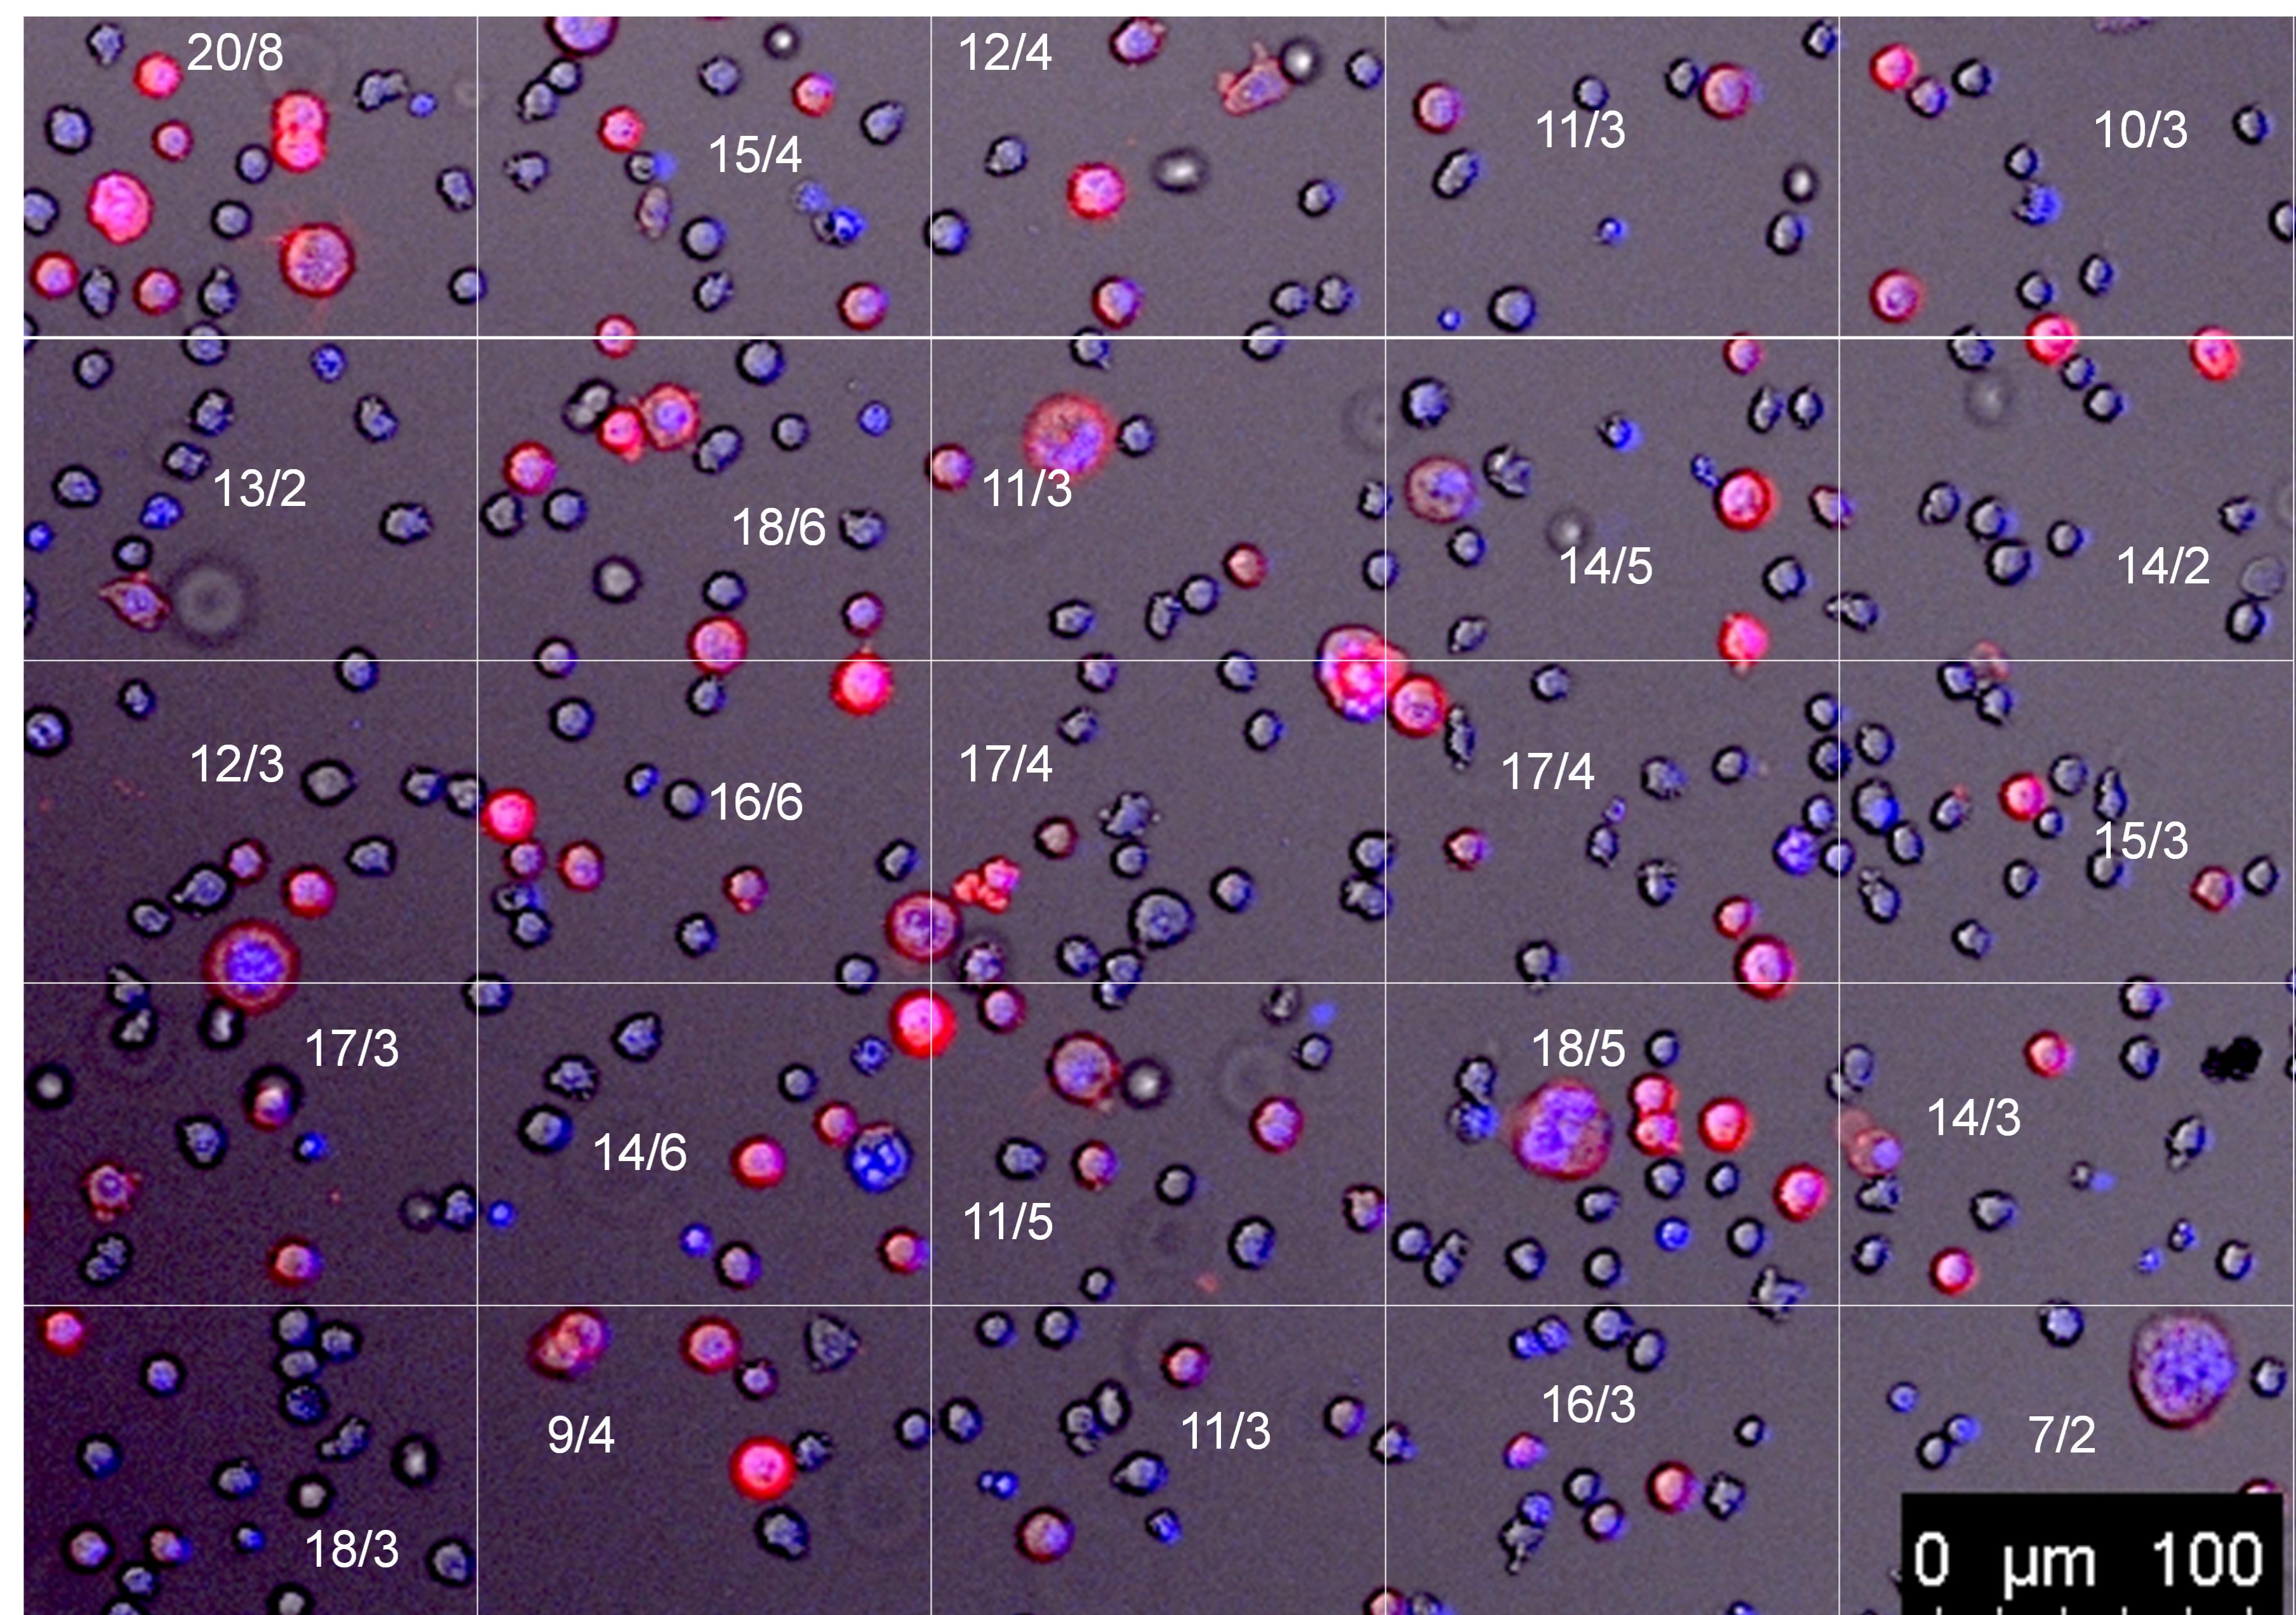

CD41  
Hoechst  
Bright field

Total: 350 / CD41+ : 97 (27.7%)

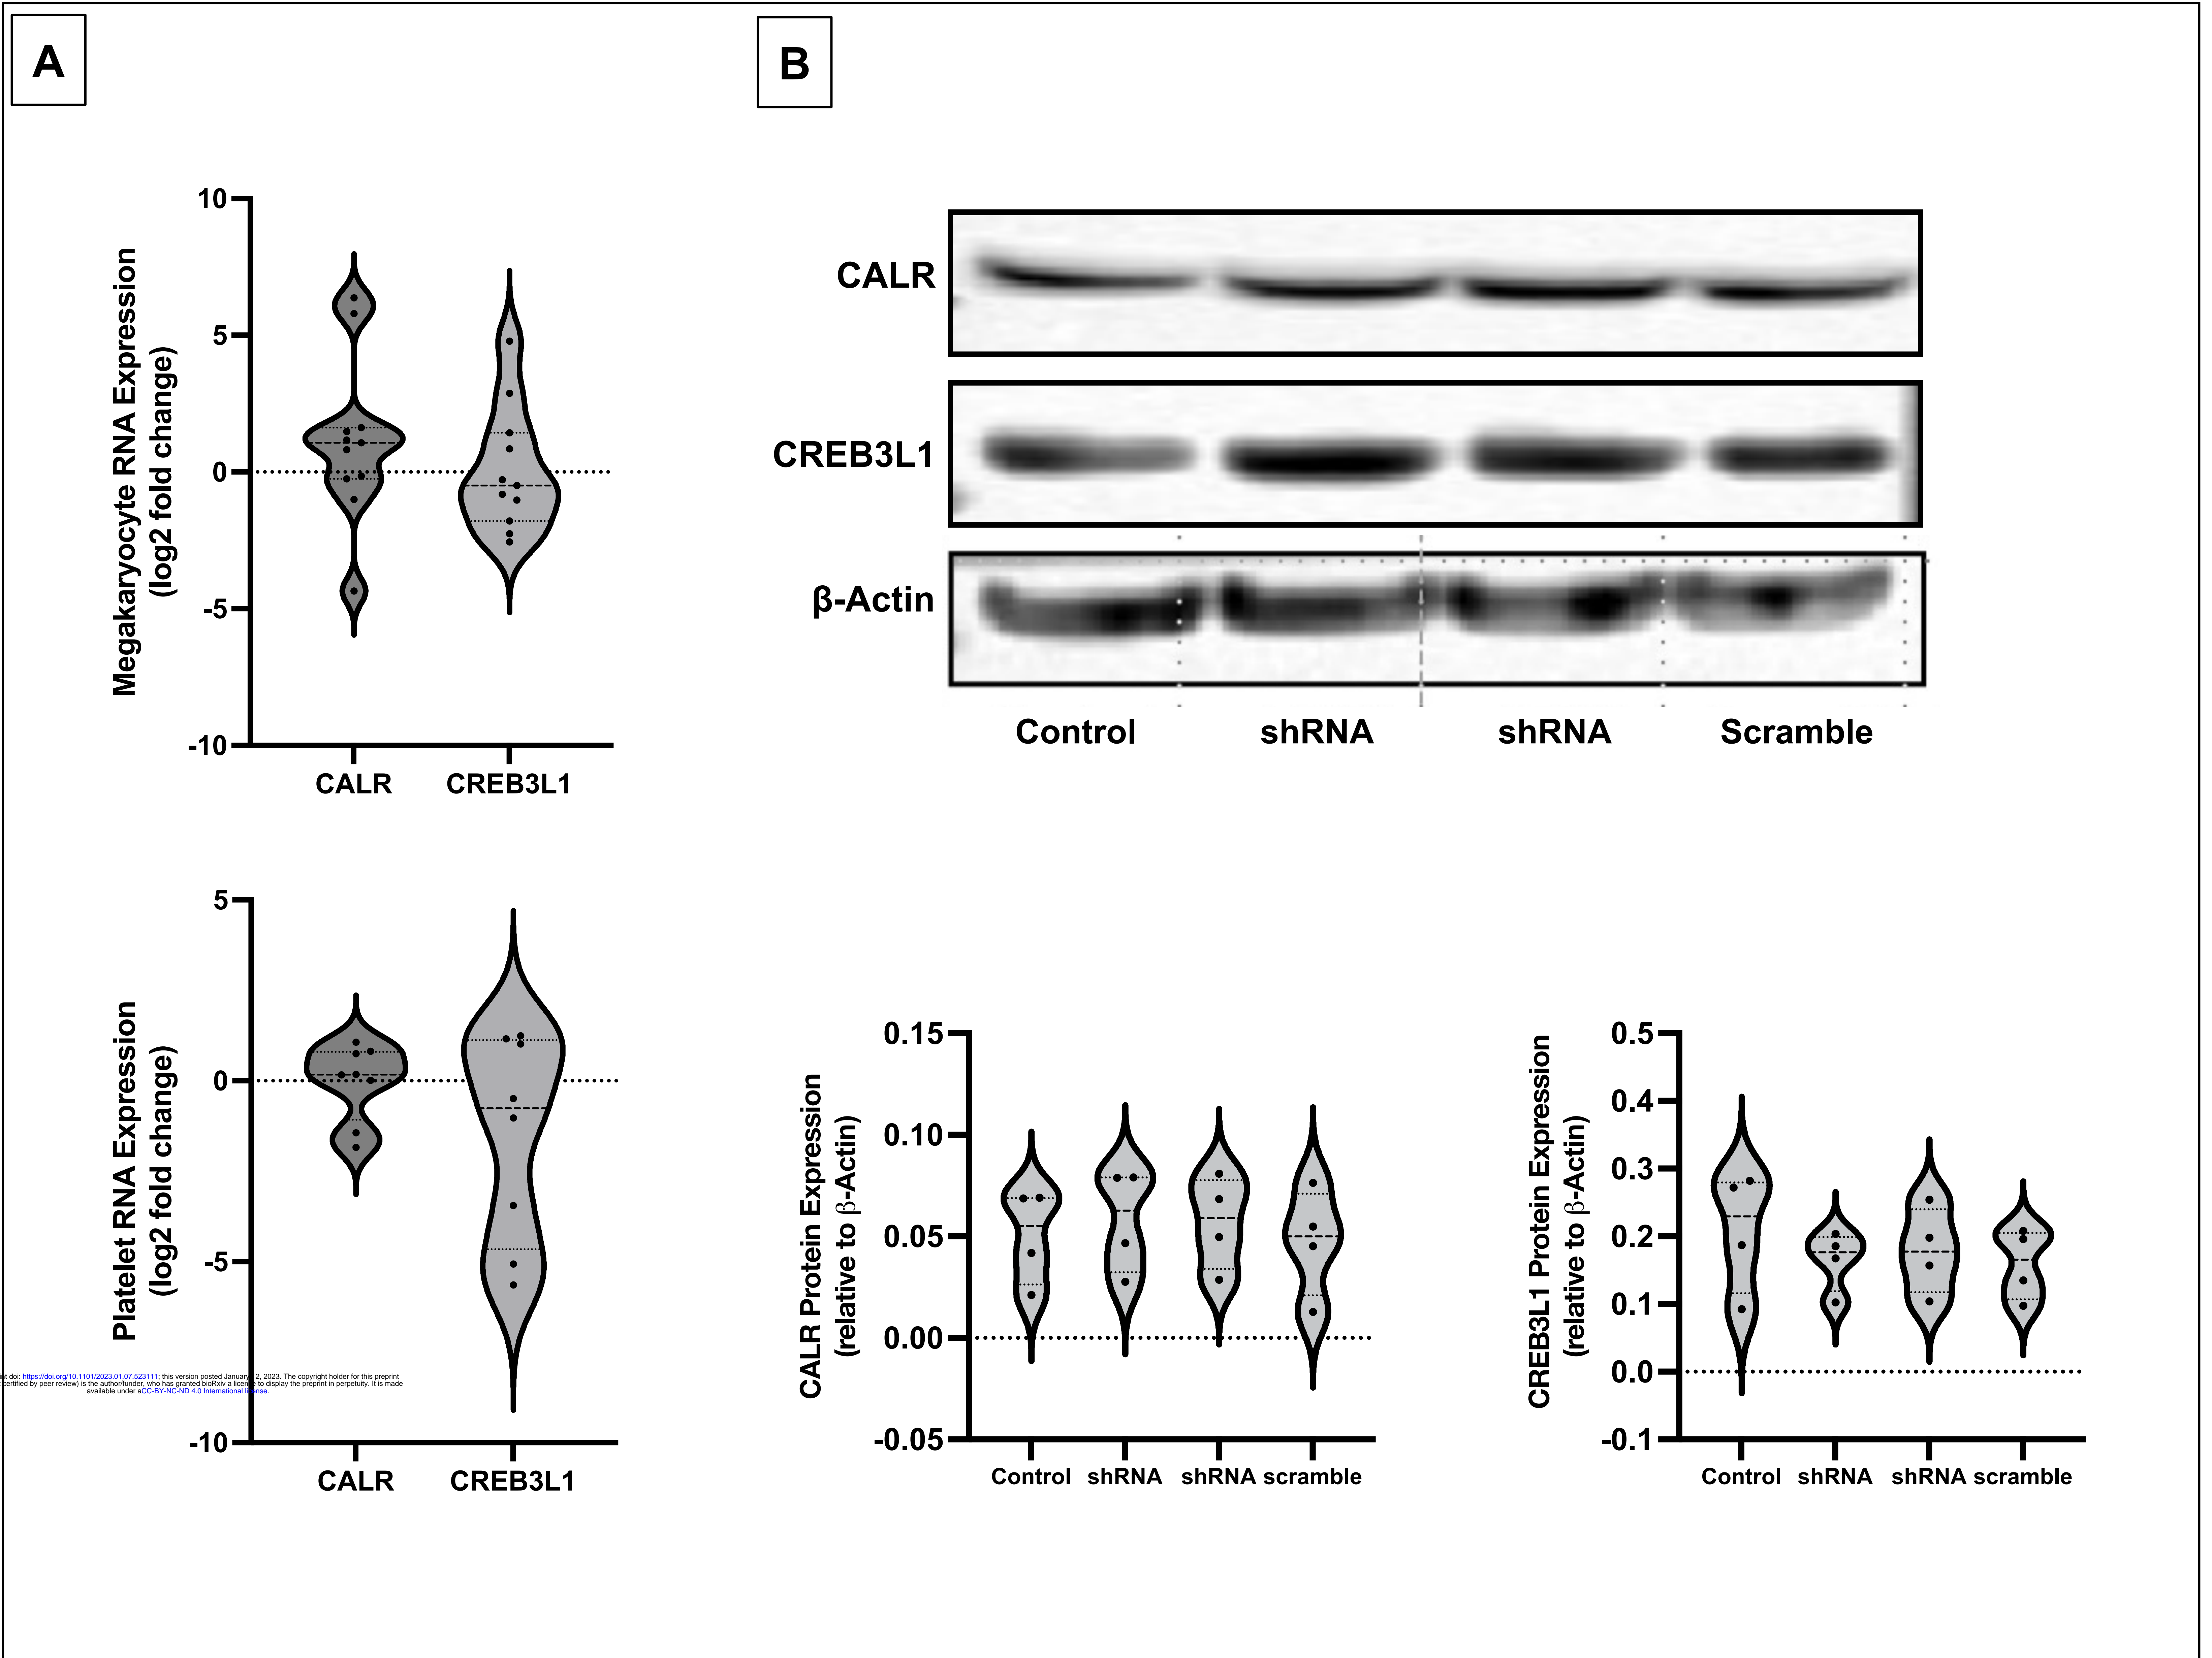

Supplement: NIHPP2023.01.07.523111v2-supplement-1.pdf [file NIHPP2023.01.07.523111v2-supplement-1.pdf]
